# Supplementary material for: Exosome-mediated miR-146a transfer suppresses type I interferon response and facilitates EV71 infection
Source: PLoS Pathog. 2017 Sep 14;13(9):e1006611. doi: 10.1371/journal.ppat.1006611 (PMC5614653; doi:10.1371/journal.ppat.1006611)
Supplement: S1 Table — (XLSX) [file ppat.1006611.s006.xlsx]

## Sheet: Sheet1
miRNA	EV71infection_count	EV71infection_Normalize	Mock_count	Mock_Normalize	FoldChange	log2FoldChange
hsa-miR-410-3p	11	29.3496	1	2.9164	10.0636	3.33108
hsa-miR-185-3p	10	26.6815	1	2.9164	9.14875	3.19358
hsa-miR-664a-5p	8	21.3452	1	2.9164	7.319	2.87165
hsa-miR-874-5p	13	34.6859	2	5.83281	5.94669	2.57209
hsa-miR-33a-5p	23	61.3674	4	11.6656	5.26053	2.39521
hsa-miR-33b-5p	145	386.881	26	75.8265	5.10219	2.35112
hsa-miR-374a-3p	56	149.416	11	32.0804	4.65755	2.21957
hsa-miR-146a-5p	15	40.0222	3	8.74921	4.57438	2.19358
hsa-miR-331-3p	9635	25707.6	1964	5727.82	4.4882	2.16614
hsa-miR-192-5p	59	157.421	17	49.5789	3.17516	1.66683
hsa-miR-6516-5p	10967	29261.6	3404	9927.44	2.94754	1.55951
hsa-miR-30d-3p	19	50.6948	6	17.4984	2.89711	1.53461
hsa-miR-4454	55	146.748	18	52.4953	2.79545	1.48308
hsa-miR-330-5p	45	120.067	15	43.7461	2.74463	1.45661
hsa-miR-151a-5p	80	213.452	28	81.6593	2.61393	1.38622
hsa-miR-4792	5803	15483.3	2065	6022.37	2.57096	1.3623
hsa-miR-374b-5p	214	570.983	78	227.48	2.51004	1.32771
hsa-miR-6087	802	2139.85	293	854.506	2.5042	1.32435
hsa-miR-340-5p	145	386.881	53	154.569	2.50296	1.32364
hsa-miR-101-3p	826	2203.89	302	880.754	2.50228	1.32324
hsa-miR-31-3p	139	370.872	52	151.653	2.44553	1.29015
hsa-miR-1307-5p	162	432.24	64	186.65	2.31578	1.2115
